# Supplementary material for: Vascular regression precedes motor neuron loss in the FUS (1-359) ALS mouse model
Source: PubMed Central journal article supplement (PMC6737946; doi:10.1242/dmm.040238), 2019-08-13
Supplement: dmm-12-040238-s1.pdf [file dmm-12-040238-s1.pdf]

Table S1: Specific numbers of mice used for histological studies.

| Tag # | Genotype | Sex | DOB        | Age (days) | Nissl staining | Immunostaining<br>PDCX-ASMA |
|-------|----------|-----|------------|------------|----------------|-----------------------------|
| 0039  | Tg       | M   | 12/23/2015 | 50         | ✓              | ✓                           |
| 0040  | Tg       | M   | 12/23/2015 | 50         | ✓              | ✓                           |
| 0042  | Tg       | F   | 12/23/2015 | 50         | ✓              | ✓                           |
| 0127  | Tg       | M   | 1/5/2016   | 50         | ✓              | ✓                           |
| 0131  | Tg       | M   | 1/5/2016   | 50         | ✓              | ✓                           |
| 0132  | Tg       | F   | 1/5/2016   | 50         | ✓              | ✓                           |
| 0133  | Tg       | F   | 1/5/2016   | 50         | ✓              | ✓                           |
| 0136  | Tg       | F   | 1/5/2016   | 50         | ✓              | ✓                           |
| 0041  | WT       | M   | 12/23/2015 | 50         | ✓              | ✓                           |
| 0043  | WT       | F   | 12/23/2015 | 50         | ✓              | ✓                           |
| 0128  | WT       | M   | 1/5/2016   | 50         | ✓              | ✓                           |
| 0134  | WT       | F   | 1/5/2016   | 50         | ✓              | ✓                           |
| 0135  | WT       | F   | 1/5/2016   | 50         | ✓              | ✓                           |
| 0138  | WT       | M   | 1/5/2016   | 50         | ✓              | ✓                           |

| Tag # | Genotype | Sex | DOB        | Age (days) | Nissl staining | Immunostaining<br>PDCX-ASMA |
|-------|----------|-----|------------|------------|----------------|-----------------------------|
| 0004  | Tg       | M   | 11/25/2015 | 90         | ✓              | X                           |
| 0006  | Tg       | M   | 11/25/2015 | 90         | ✓              | X                           |
| 1525  | Tg       | F   | 9/6/2015   | 90         | ✓              | ✓                           |
| 1978  | Tg       | F   | 11/24/2015 | 90         | ✓              | ✓                           |
| 1979  | Tg       | F   | 11/24/2015 | 90         | ✓              | ✓                           |
| 1981  | Tg       | F   | 11/24/2015 | 90         | ✓              | ✓                           |
| 1982  | Tg       | F   | 11/24/2015 | 90         | X              | ✓                           |
| 1985  | Tg       | M   | 11/24/2015 | 90         | X              | ✓                           |
| 1989  | Tg       | F   | 11/24/2015 | 90         | ✓              | X                           |
| 1992  | Tg       | M   | 11/24/2015 | 90         | ✓              | ✓                           |
| 1993  | Tg       | M   | 11/24/2015 | 90         | ✓              | ✓                           |
| 1994  | Tg       | M   | 11/24/2015 | 90         | ✓              | ✓                           |
| 0005  | WT       | M   | 11/25/2015 | 90         | ✓              | ✓                           |
| 1524  | WT       | F   | 9/6/2015   | 90         | ✓              | ✓                           |
| 1533  | WT       | M   | 9/6/2015   | 90         | ✓              | ✓                           |
| 1980  | WT       | F   | 11/24/2015 | 90         | ✓              | ✓                           |
| 1984  | WT       | M   | 11/24/2015 | 90         | ✓              | ✓                           |
| 1986  | WT       | M   | 11/24/2015 | 90         | ✓              | ✓                           |
| 1990  | WT       | F   | 11/24/2015 | 90         | ✓              | ✓                           |
| 1995  | WT       | M   | 11/24/2015 | 90         | ✓              | X                           |

| Tag # | Genotype | Sex | DOB       | Age (days) | Nissl staining |
|-------|----------|-----|-----------|------------|----------------|
| 0036  | Tg       | F   | 9/26/2014 | 120        | ✓              |
| 0047  | Tg       | M   | 10/5/2014 | 120        | ✓              |
| 0049  | Tg       | M   | 10/5/2014 | 120        | ✓              |
| 0050  | Tg       | M   | 10/5/2014 | 120        | ✓              |
| 0051  | Tg       | M   | 10/5/2014 | 120        | ✓              |
| 0052  | Tg       | M   | 10/5/2014 | 120        | ✓              |
| 0038  | WT       | F   | 9/26/2014 | 120        | ✓              |
| 0039  | WT       | F   | 9/26/2014 | 120        | ✓              |
| 0040  | WT       | F   | 9/26/2014 | 120        | ✓              |
| 0041  | WT       | F   | 9/26/2014 | 120        | ✓              |

| Tag # | Genotype | Sex | DOB        | Age (days) | Treatment | Nissl staining | Immunostaining<br>PDCX-ASMA |
|-------|----------|-----|------------|------------|-----------|----------------|-----------------------------|
| 0011  | Tg       | F   | 11/25/2015 | 70         | 1ug ANG   | ✓              | ✓                           |
| 1926  | Tg       | F   | 11/7/2015  | 70         | 1ug ANG   | ✓              | ✓                           |
| 1957  | Tg       | F   | 11/21/2015 | 70         | 1ug ANG   | ✓              | ✓                           |
| 1962  | Tg       | F   | 11/21/2015 | 70         | 1ug ANG   | ✓              | ✓                           |
| 1904  | Tg       | M   | 11/1/2015  | 70         | 1ug ANG   | ✓              | ✓                           |
| 1905  | Tg       | M   | 11/1/2015  | 70         | 1ug ANG   | ✓              | ✓                           |
| 1917  | Tg       | M   | 11/7/2015  | 70         | 1ug ANG   | ✓              | ✓                           |
| 1922  | Tg       | M   | 11/7/2015  | 70         | 1ug ANG   | ✓              | ✓                           |
| 0012  | WT       | F   | 11/25/2015 | 70         | 1ug ANG   | ✓              | ✓                           |
| 1912  | WT       | F   | 11/7/2015  | 70         | 1ug ANG   | ✓              | ✓                           |
| 1913  | WT       | F   | 11/7/2015  | 70         | 1ug ANG   | ✓              | ✓                           |
| 1958  | WT       | F   | 11/21/2015 | 70         | 1ug ANG   | ✓              | ✓                           |
| 1963  | WT       | F   | 11/21/2015 | 70         | 1ug ANG   | ✓              | ✓                           |
| 1908  | WT       | M   | 11/1/2015  | 70         | 1ug ANG   | ✓              | ✓                           |
| 1909  | WT       | M   | 11/1/2015  | 70         | 1ug ANG   | ✓              | ✓                           |
| 1918  | WT       | M   | 11/7/2015  | 70         | 1ug ANG   | ✓              | ✓                           |
| 1923  | WT       | M   | 11/7/2015  | 70         | 1ug ANG   | ✓              | ✓                           |
| 1952  | WT       | M   | 11/21/2015 | 70         | 1ug ANG   | ✓              | ✓                           |
| 0003  | Tg       | F   | 11/25/2015 | 70         | Vehicle   | ✓              | ✓                           |
| 1925  | Tg       | F   | 11/7/2015  | 70         | Vehicle   | ✓              | ✓                           |
| 1961  | Tg       | F   | 11/21/2015 | 70         | Vehicle   | ✓              | ✓                           |
| 1906  | Tg       | M   | 11/1/2015  | 70         | Vehicle   | ✓              | ✓                           |
| 1907  | Tg       | M   | 11/1/2015  | 70         | Vehicle   | ✓              | ✓                           |
| 1920  | Tg       | M   | 11/7/2015  | 70         | Vehicle   | ✓              | ✓                           |
| 1953  | Tg       | M   | 11/21/2015 | 70         | Vehicle   | ✓              | ✓                           |
| 1914  | WT       | F   | 11/7/2015  | 70         | Vehicle   | ✓              | ✓                           |
| 1915  | WT       | F   | 11/7/2015  | 70         | Vehicle   | ✓              | ✓                           |
| 1959  | WT       | F   | 11/21/2015 | 70         | Vehicle   | ✓              | ✓                           |
| 1964  | WT       | F   | 11/21/2015 | 70         | Vehicle   | ✓              | ✓                           |
| 1910  | WT       | M   | 11/1/2015  | 70         | Vehicle   | ✓              | ✓                           |
| 1911  | WT       | M   | 11/1/2015  | 70         | Vehicle   | ✓              | ✓                           |
| 1919  | WT       | M   | 11/7/2015  | 70         | Vehicle   | ✓              | ✓                           |
| 1924  | WT       | M   | 11/7/2015  | 70         | Vehicle   | ✓              | ✓                           |

Table S2: Specific numbers of mice used for lifespan studies.

| Tag # | Genotype | Sex | Treatment | DOB       |
|-------|----------|-----|-----------|-----------|
| 434   | Tg       | F   | huANG     | 1/19/2015 |
| 435   | Tg       | F   | huANG     | 1/19/2015 |
| 436   | Tg       | F   | huANG     | 1/19/2015 |
| 437   | Tg       | F   | huANG     | 1/19/2015 |
| 451   | Tg       | M   | huANG     | 1/24/2015 |
| 452   | Tg       | M   | huANG     | 1/24/2015 |
| 453   | Tg       | M   | huANG     | 1/24/2015 |
| 614   | Tg       | F   | huANG     | 2/28/2015 |
| 615   | Tg       | F   | huANG     | 2/28/2015 |
| 616   | Tg       | F   | huANG     | 2/28/2015 |
| 765   | Tg       | F   | huANG     | 3/15/2015 |
| 769   | Tg       | F   | huANG     | 3/15/2015 |
| 747   | Tg       | M   | huANG     | 3/16/2015 |
| 749   | Tg       | M   | huANG     | 3/16/2015 |
| 750   | Tg       | M   | huANG     | 3/16/2015 |
| 1128  | Tg       | F   | huANG     | 5/26/2015 |
| 1129  | Tg       | F   | huANG     | 5/26/2015 |
| 1134  | Tg       | M   | huANG     | 6/2/2015  |
| 1213  | Tg       | F   | huANG     | 6/18/2015 |
| 1215  | Tg       | M   | huANG     | 6/18/2015 |
| 1348  | Tg       | M   | huANG     | 7/1/2015  |
| 1379  | Tg       | M   | huANG     | 7/19/2015 |
| 447   | Tg       | M   | PBS       | 1/24/2015 |
| 786   | Tg       | M   | PBS       | 3/15/2015 |
| 788   | Tg       | F   | PBS       | 3/17/2015 |
| 790   | Tg       | F   | PBS       | 3/17/2015 |
| 792   | Tg       | F   | PBS       | 3/23/2015 |
| 793   | Tg       | F   | PBS       | 3/23/2015 |
| 1019  | Tg       | M   | PBS       | 5/7/2015  |
| 1020  | Tg       | M   | PBS       | 5/7/2015  |
| 1027  | Tg       | F   | PBS       | 5/7/2015  |
| 1028  | Tg       | F   | PBS       | 5/7/2015  |
| 1061  | Tg       | M   | PBS       | 5/12/2015 |
| 1054  | Tg       | F   | PBS       | 5/19/2015 |
| 1055  | Tg       | F   | PBS       | 5/19/2015 |
| 1132  | Tg       | F   | PBS       | 5/26/2015 |
| 1137  | Tg       | F   | PBS       | 6/2/2015  |
| 1138  | Tg       | F   | PBS       | 6/2/2015  |
| 1139  | Tg       | F   | PBS       | 6/2/2015  |
| 1140  | Tg       | F   | PBS       | 6/2/2015  |
| 1142  | Tg       | F   | PBS       | 6/2/2015  |
| 1214  | Tg       | F   | PBS       | 6/18/2015 |
| 1205  | Tg       | M   | PBS       | 6/19/2015 |
| 1209  | Tg       | M   | PBS       | 6/18/2015 |
| 1339  | Tg       | M   | PBS       | 7/1/2015  |
| 1362  | Tg       | M   | PBS       | 7/16/2015 |
| 1362  | Tg       | M   | PBS       | 7/16/2015 |
